# Supplementary material for: A multiplexed siRNA screen identifies key kinase signaling networks of brain glia
Source: Life Sci Alliance. 2023 Mar 6;6(5):e202201605. doi: 10.26508/lsa.202201605 (PMC9990460; doi:10.26508/lsa.202201605)
Supplement: Supplementary file 2 [file LSA-2022-01605_TableS2.xlsx]

## Sheet: Table S2
	Table S2. Criteria for selecting a subset of kinases used in the validation experiments of siRNA knockdown efficiency
	Three or four kinases were chosen from the results of each phenotypic screen: 4 kinases from activation screen; 4 kinases from migration screen; 3 kinases from phagocytosis screen; 4 kinases that did not show significant effects in any screens. Some kinases showed significant effects in two different screens.
	Targets	Results of glial phenotypic screen
		No significant effects in any screens	Significant effects in activation screen	Significant effects in migration screen	Significant effects in phagocytosis screen
	Epha1	○
	Epha2	○
	Akt2	○
	Mlkl	○
	Itk		○
	Ckb		○
	Irak4		○
	Ulk1		○		○
	Pdk2			○
	Pkm2			○
	Lrrk2			○	○
	Frap1			○	○
