# Supplementary material for: A multiplexed siRNA screen identifies key kinase signaling networks of brain glia
Source: Life Sci Alliance. 2023 Mar 6;6(5):e202201605. doi: 10.26508/lsa.202201605 (PMC9990460; doi:10.26508/lsa.202201605)
Supplement: Supplementary file 4 [file LSA-2022-01605_TableS4.xlsx]

## Sheet: Table S4
	Table S4. Kinases identified in nitric oxide assay
	siRNAs increasing nitric oxide production (kinases inhibiting glial activation)
	Kinase	Gene ID	log2(FC)	Description
	Mylk	107589	2.73054	myosin, light polypeptide kinase(Mylk)
	Pkmyt1	268930	1.51415	protein kinase, membrane associated tyrosine/threonine 1(Pkmyt1)
	Brd3	67382	1.06484	bromodomain containing 3(Brd3)
	Tssk4	71099	0.835834	testis-specific serine kinase 4(Tssk4)
	Pi4k2a	84095	0.798692	phosphatidylinositol 4-kinase type 2 alpha(Pi4k2a)
	Map4k2	26412	0.793542	mitogen-activated protein kinase kinase kinase kinase 2(Map4k2)
	Dgkz	104418	0.739484	diacylglycerol kinase zeta(Dgkz)
	Grk1	24013	0.728546	G protein-coupled receptor kinase 1(Grk1)
	Dyrk4	101320	0.688392	dual-specificity tyrosine-(Y)-phosphorylation regulated kinase 4(Dyrk4)
	Map3k3	26406	0.659323	mitogen-activated protein kinase kinase kinase 3(Map3k3)
	Ckmt1	12716	0.634083	creatine kinase, mitochondrial 1, ubiquitous(Ckmt1)
	Pip5k2a	18718	0.54115	phosphatidylinositol-5-phosphate 4-kinase, type II, alpha(Pip4k2a)
	Riok3	66878	0.516683	RIO kinase 3(Riok3)
	Dyrk2	69181	0.46322	dual-specificity tyrosine-(Y)-phosphorylation regulated kinase 2(Dyrk2)
	Dgka	13139	0.45598	diacylglycerol kinase, alpha(Dgka)
	Csnk1g2	103236	0.45554	casein kinase 1, gamma 2(Csnk1g2)
	siRNAs decreasing NO production (kinases enhancing glial activation)
	Kinase	Gene ID	log2(FC)	Description
	Irak1	16179	-1.71599	interleukin-1 receptor-associated kinase 1(Irak1)
	Ror2	26564	-1.41145	receptor tyrosine kinase-like orphan receptor 2(Ror2)
	Ptk9	19230	-1.30315	twinfilin actin binding protein 1(Twf1)
	Bcr	110279	-1.28017	breakpoint cluster region(Bcr)
	Itpkb	320404	-1.23565	inositol 1,4,5-trisphosphate 3-kinase B(Itpkb)
	Gprk2l	14772	-1.13854	G protein-coupled receptor kinase 4(Grk4)
	Prkar2b	19088	-1.13354	protein kinase, cAMP dependent regulatory, type II beta(Prkar2b)
	Camk2b	12323	-1.09205	calcium/calmodulin-dependent protein kinase II, beta(Camk2b)
	Nrk	27206	-1.02554	Nik related kinase(Nrk)
	Tlk1	228012	-0.999692	tousled-like kinase 1(Tlk1)
	Tesk2	230661	-0.978961	testis-specific kinase 2(Tesk2)
	Abl2	11352	-0.973839	v-abl Abelson murine leukemia viral oncogene 2 (arg, Abelson-related gene)(Abl2)
	Npr1	18160	-0.934516	natriuretic peptide receptor 1(Npr1)
	Rps6kc1	320119	-0.911384	ribosomal protein S6 kinase polypeptide 1(Rps6kc1)
	Map4k1	26411	-0.887895	mitogen-activated protein kinase kinase kinase kinase 1(Map4k1)
	Egfr	13649	-0.870314	epidermal growth factor receptor(Egfr)
	Gsk3a	606496	-0.858107	glycogen synthase kinase 3 alpha(Gsk3a)
	Gsk3b	56637	-0.856121	glycogen synthase kinase 3 beta(Gsk3b)
	Epha8	13842	-0.805192	Eph receptor A8(Epha8)
	Ikbkb	16150	-0.79144	inhibitor of kappaB kinase beta(Ikbkb)
	Tbk1	56480	-0.771168	TANK-binding kinase 1(Tbk1)
	Ephb6	13848	-0.764173	Eph receptor B6(Ephb6)
	Jak2	16452	-0.763143	Janus kinase 2(Jak2)
	Ephb2	13844	-0.753676	Eph receptor B2(Ephb2)
	Mapk15	332110	-0.71921	mitogen-activated protein kinase 15(Mapk15)
	Hk3	212032	-0.705639	hexokinase 3(Hk3)
	Prkdc	19090	-0.699298	protein kinase, DNA activated, catalytic polypeptide(Prkdc)
	Ltk	17005	-0.697877	leukocyte tyrosine kinase(Ltk)
	Map3k6	53608	-0.678539	mitogen-activated protein kinase kinase kinase 6(Map3k6)
	Tk1	21877	-0.675951	thymidine kinase 1(Tk1)
	Rps6kb2	58988	-0.670545	ribosomal protein S6 kinase, polypeptide 2(Rps6kb2)
	Fgfr4	14186	-0.665195	fibroblast growth factor receptor 4(Fgfr4)
	Trpm7	58800	-0.661769	transient receptor potential cation channel, subfamily M, member 7(Trpm7)
	Ptk6	20459	-0.640124	PTK6 protein tyrosine kinase 6(Ptk6)
	Hipk1	15257	-0.636328	homeodomain interacting protein kinase 1(Hipk1)
	Rps6kl1	238323	-0.629983	ribosomal protein S6 kinase-like 1(Rps6kl1)
	Camk2g	12325	-0.619597	calcium/calmodulin-dependent protein kinase II gamma(Camk2g)
	Jak1	16451	-0.615547	Janus kinase 1(Jak1)
	Epha3	13837	-0.614229	Eph receptor A3(Epha3)
	Cdk5	12568	-0.610121	cyclin-dependent kinase 5(Cdk5)
	Tnk2	51789	-0.604935	tyrosine kinase, non-receptor, 2(Tnk2)
	Prkx	19108	-0.600664	protein kinase, X-linked(Prkx)
	Stk39	53416	-0.599081	serine/threonine kinase 39(Stk39)
	Ckmt2	76722	-0.59508	creatine kinase, mitochondrial 2(Ckmt2)
	Trim28	21849	-0.593743	tripartite motif-containing 28(Trim28)
	Wnk4	69847	-0.593343	WNK lysine deficient protein kinase 4(Wnk4)
	Csf1r	12978	-0.592879	colony stimulating factor 1 receptor(Csf1r)
	Prkar2a	19087	-0.588559	protein kinase, cAMP dependent regulatory, type II alpha(Prkar2a)
	Rps6ka5	73086	-0.583127	ribosomal protein S6 kinase, polypeptide 5(Rps6ka5)
	Camk1g	215303	-0.581237	calcium/calmodulin-dependent protein kinase I gamma(Camk1g)
	Ikbke	56489	-0.580381	inhibitor of kappaB kinase epsilon(Ikbke)
	Tgfbr1	21812	-0.577545	transforming growth factor, beta receptor I(Tgfbr1)
	Pmvk	68603	-0.577475	phosphomevalonate kinase(Pmvk)
	Wee1	22390	-0.576809	WEE 1 homolog 1 (S. pombe)(Wee1)
	Tssk3	58864	-0.575248	testis-specific serine kinase 3(Tssk3)
	Gck	103988	-0.573568	glucokinase(Gck)
	Ckb	12709	-0.570893	creatine kinase, brain(Ckb)
	Csnk1g1	214897	-0.570743	casein kinase 1, gamma 1(Csnk1g1)
	Ephb4	13846	-0.563428	Eph receptor B4(Ephb4)
	Map3k13	71751	-0.562696	mitogen-activated protein kinase kinase kinase 13(Map3k13)
	Aurka	20878	-0.561222	aurora kinase A(Aurka)
	Taok2	381921	-0.560958	TAO kinase 2(Taok2)
	Mulk	69923	-0.557247	acylglycerol kinase(Agk)
	Ulk1	22241	-0.550696	unc-51 like kinase 1(Ulk1)
	Stk32b	64293	-0.54882	serine/threonine kinase 32B(Stk32b)
	Ptk9l	23999	-0.543288	twinfilin actin binding protein 2(Twf2)
	Mapk11	19094	-0.537303	mitogen-activated protein kinase 11(Mapk11)
	Igf1r	16001	-0.534494	insulin-like growth factor I receptor(Igf1r)
	Ulk3	71742	-0.524864	unc-51-like kinase 3(Ulk3)
	Prkg2	19092	-0.522491	protein kinase, cGMP-dependent, type II(Prkg2)
	Met	17295	-0.511686	met proto-oncogene(Met)
	Trpm6	225997	-0.510112	transient receptor potential cation channel, subfamily M, member 6(Trpm6)
	Camk2a	12322	-0.498174	calcium/calmodulin-dependent protein kinase II alpha(Camk2a)
	Erbb2	13866	-0.496918	erb-b2 receptor tyrosine kinase 2(Erbb2)
	Prkci	18759	-0.489808	protein kinase C, iota(Prkci)
	Epha5	13839	-0.485225	Eph receptor A5(Epha5)
	Itk	16428	-0.484925	IL2 inducible T cell kinase(Itk)
	Pik3r3	18710	-0.475918	phosphatidylinositol 3 kinase, regulatory subunit, polypeptide 3 (p55)(Pik3r3)
	Akt1	11651	-0.475059	thymoma viral proto-oncogene 1(Akt1)
	Aak1	269774	-0.46937	AP2 associated kinase 1(Aak1)
	Tek	21687	-0.468954	endothelial-specific receptor tyrosine kinase(Tek)
	Lmtk2	231876	-0.468868	lemur tyrosine kinase 2(Lmtk2)
	Irak4	266632	-0.468619	interleukin-1 receptor-associated kinase 4(Irak4)
	Mos	17451	-0.455945	Moloney sarcoma oncogene(Mos)
	Pdk1	228026	-0.453584	pyruvate dehydrogenase kinase, isoenzyme 1(Pdk1)
	Mapk13	26415	-0.451911	mitogen-activated protein kinase 13(Mapk13)
