# Supplementary material for: A multiplexed siRNA screen identifies key kinase signaling networks of brain glia
Source: Life Sci Alliance. 2023 Mar 6;6(5):e202201605. doi: 10.26508/lsa.202201605 (PMC9990460; doi:10.26508/lsa.202201605)
Supplement: Supplementary file 5 [file LSA-2022-01605_TableS5.xlsx]

## Sheet: Table S5
	Table S5. KEGG pathway of the kinases identified in nitric oxide assay
	KEGG pathway of glial inhibitors
	Term	p-value (-log10)	Kinases (gene ID)
	mmu04070:Phosphatidylinositol signaling system	3.65979	18718, 104418, 84095, 13139
	mmu00562:Inositol phosphate metabolism	1.05836	18718, 84095
	mmu00561:Glycerolipid metabolism	1.137	104418, 13139
	KEGG pathway of glial activators
	Term	p-value (-log10)	Kinases (gene ID)
	mmu04066:HIF-1 signaling pathway	9.27106	18753, 16885, 16886, 12929, 72508, 110157, 20698, 17096
	mmu04722:Neurotrophin signaling pathway	8.43024	13649, 12323, 56637, 12929, 72508, 110157, 11352
	mmu04012:ErbB signaling pathway	7.48144	13649, 21687, 14924, 12929, 16001, 18759, 12978, 17295, 110157
	mmu05230:Central carbon metabolism in cancer	6.07302	13649, 56421, 18213, 17295, 110157, 212032
	mmu04620:Toll-like receptor signaling pathway	5.7921	18753, 12323, 18213, 56637, 12929, 23939, 110157
	mmu04015:Rap1 signaling pathway	5.03713	19229, 18753, 19877, 56637, 12929, 16428, 110157, 17096
	mmu04151:PI3K-Akt signaling pathway	4.58619	19229, 13649, 18753, 12323, 23939, 110157
	mmu04660:T cell receptor signaling pathway	3.74731	13649, 19877, 16202, 56637, 12929, 16001, 17295, 110157
	mmu04912:GnRH signaling pathway	3.10549	13649, 23920, 19877, 16885, 16886, 12929, 17451, 110157
	mmu04062:Chemokine signaling pathway	2.94329	13649, 21687, 12323, 72508, 16001, 212032
	mmu04668:TNF signaling pathway	2.68901	13649, 110279, 19877, 21812, 56637, 12929, 16001, 12978, 17295, 110157
	mmu04510:Focal adhesion	2.14045	53608, 13649, 17165, 21812, 381921, 12929, 23939, 110157
	mmu04370:VEGF signaling pathway	1.87206	19877, 16885, 13848, 16886, 56637, 17295
