# Supplementary material for: A multiplexed siRNA screen identifies key kinase signaling networks of brain glia
Source: Life Sci Alliance. 2023 Mar 6;6(5):e202201605. doi: 10.26508/lsa.202201605 (PMC9990460; doi:10.26508/lsa.202201605)
Supplement: Supplementary file 6 [file LSA-2022-01605_TableS6.xlsx]

## Sheet: Table S6
	Table S6. Kinases identified in cell death assay
	siRNAs inducing cell death (kinases essential for glial cell survival)
	Kinases	Gene ID	log2(FC)	Description
	Ntrk1	18211	0.937616	neurotrophic_tyrosine_kinase,_receptor,type_1,_transcript_variant_2_(Ntrk1)
	Tnk1	83813	0.87146	tyrosine_kinase,_non-receptor,_1_(Tnk1)
	Lmtk2	231876	0.558324	lemur_tyrosine_kinase_2_(Lmtk2)
	Nek11	208583	0.552549	NIMA_(never_in_mitosis_gene_a)-related_expressedkinase_11_(Nek11)
	Mak	17152	0.54486	male_germ_cell-associated_kinase_(Mak)
	Csnk1e	27373	0.53228	casein_kinase_1,_epsilon_(Csnk1e)
	Itpk1	217837	0.519999	inositol_1,3,4-triphosphate_5/6_kinase_(Itpk1)
	Pfkl	18641	0.497564	phosphofructokinase,_liver,_B-type_(Pfkl)
	Tex14	83560	0.491926	testis_expressed_gene_14_(Tex14)
	Map3k10	269881	0.485968	mitogen_activated_protein_kinase_kinasekinase_10,_transcript_variant_8_(Map3k10)
	Prkaca	18747	0.46193	protein_kinase,_cAMP_dependent,_catalytic,_alpha(Prkaca)
	BC030499	216976	0.459873	cDNA_sequence_BC030499_(BC030499)
	Pctk3	18557	0.457256	PCTAIRE-motif_protein_kinase_3_(Pctk3)
	Map3k6	53608	0.455337	mitogen-activated_protein_kinase_kinase_kinase_6(Map3k6)
	Src	20779	0.452728	Rous_sarcoma_oncogene_(Src),_transcript_variant_1
