# Supplementary material for: A multiplexed siRNA screen identifies key kinase signaling networks of brain glia
Source: Life Sci Alliance. 2023 Mar 6;6(5):e202201605. doi: 10.26508/lsa.202201605 (PMC9990460; doi:10.26508/lsa.202201605)
Supplement: Supplementary file 7 [file LSA-2022-01605_TableS7.xlsx]

## Sheet: Table S7
Table S7. KEGG pathway of the kinases identified in cell death assay
	KEGG pathway
	Term	p-value (-log10)	Kinase (Entrez ID)
	mmu04919:Thyroid hormone signaling pathway	2.45033	18641, 20779, 18747
	mmu04750:Inflammatory mediator regulation of TRP channels	2.40201	18211, 20779, 18747
	mmu04010:MAPK signaling pathway	1.69806	53608, 18211, 18747
	mmu04340:Hedgehog signaling pathway	1.35387	27373, 18747
