# Supplementary material for: A multiplexed siRNA screen identifies key kinase signaling networks of brain glia
Source: Life Sci Alliance. 2023 Mar 6;6(5):e202201605. doi: 10.26508/lsa.202201605 (PMC9990460; doi:10.26508/lsa.202201605)
Supplement: Supplementary file 9 [file LSA-2022-01605_TableS9.xlsx]

## Sheet: Table S9
	Table S9. KEGG pathway of the kinases identified in wound healing assay
	KEGG pathway of glial migration decelerators
	Term	p-value (-log10)	Kinases (Entrez ID)
	mmu04150:mTOR signaling pathway	5.88	56717, 71742, 20869, 30955, 58988, 108079, 109880
	mmu04910:Insulin signaling pathway	5.77	56717, 216019, 30955, 11836, 18759, 18679, 58988, 108079, 109880
	mmu05230:Central carbon metabolism in cancer	5.67	18746, 13649, 56717, 216019, 14183, 30955, 17295
	mmu04151:PI3K-Akt signaling pathway	5.22	13649, 56717, 14183, 20869, 30955, 20393, 12566, 12978, 58988, 108079, 17295, 16542
	mmu04012:ErbB signaling pathway	4.88	13649, 56717, 12323, 30955, 11836, 58988, 109880
	mmu05215:Prostate cancer	4.86	13649, 56717, 14183, 30955, 11836, 12566, 109880
	mmu04068:FoxO signaling pathway	4.83	13649, 20869, 30955, 11836, 20393, 12566, 108079, 109880
	mmu05205:Proteoglycans in cancer	4.57	13649, 56717, 12323, 30955, 11836, 58988, 109880, 17295, 16542
	mmu05214:Glioma	4.37	13649, 56717, 12323, 30955, 11836, 109880
	mmu04914:Progesterone-mediated oocyte maturation	3.76	30955, 11836, 17451, 12566, 109880, 12534
	mmu04015:Rap1 signaling pathway	3.54	13649, 14183, 30955, 18759, 12978, 109880, 17295, 16542
	mmu05223:Non-small cell lung cancer	3.45	13649, 11682, 30955, 11836, 109880
	mmu05221:Acute myeloid leukemia	3.45	56717, 30955, 11836, 58988, 109880
	mmu04066:HIF-1 signaling pathway	3.44	13649, 56717, 12323, 216019, 30955, 58988
	mmu05218:Melanoma	3.05	13649, 30955, 11836, 109880, 17295
	mmu04810:Regulation of actin cytoskeleton	2.76	13649, 18718, 14183, 30955, 11836, 17451, 109880
	mmu01130:Biosynthesis of antibiotics	2.75	18746, 216019, 171567, 79059, 328099, 18663, 75533
	mmu05200:Pathways in cancer	2.61	13649, 56717, 14183, 30955, 11836, 12566, 12978, 109880, 17295
	mmu04930:Type II diabetes mellitus	2.46	18746, 56717, 216019, 30955
	mmu05213:Endometrial cancer	2.42	13649, 30955, 11836, 109880
	mmu04722:Neurotrophin signaling pathway	2.2	17164, 12323, 17179, 30955, 109880
	mmu05212:Pancreatic cancer	2.14	13649, 30955, 11836, 109880
	mmu04152:AMPK signaling pathway	2.12	56717, 20869, 30955, 58988, 108079
	mmu05211:Renal cell carcinoma	2.09	30955, 11836, 109880, 17295
	mmu04014:Ras signaling pathway	1.91	13649, 14183, 30955, 12978, 17295, 16542
	mmu01100:Metabolic pathways	1.78	18746, 80914, 211347, 214253, 328099, 75735, 18663, 69923, 102448, 216134, 79059, 216019, 171567, 240752, 75533
	mmu00240:Pyrimidine metabolism	1.64	80914, 171567, 79059, 75533
	mmu04922:Glucagon signaling pathway	1.64	18746, 12323, 18679, 108079
	mmu00230:Purine metabolism	1.63	18746, 171567, 79059, 328099, 75533
	mmu05231:Choline metabolism in cancer	1.63	13649, 56717, 30955, 58988
	mmu05219:Bladder cancer	1.59	13649, 11836, 109880
	mmu04931:Insulin resistance	1.53	56717, 30955, 58988, 108079
	mmu04114:Oocyte meiosis	1.51	12323, 17451, 12566, 12534
	mmu01200:Carbon metabolism	1.47	18746, 216019, 328099, 18663
	mmu04510:Focal adhesion	1.43	13649, 30955, 109880, 17295, 16542
	KEGG pathway of glial migration accelerators
	Term	p-value (-log10)	Kinases (Entrez ID)
	mmu04660:T cell receptor signaling pathway	5.71	16818, 26413, 14360, 53859, 26410, 110157
	mmu04380:Osteoclast differentiation	3.86	16818, 26413, 21812, 14360, 53859
	mmu04010:MAPK signaling pathway	3.8	26413, 21812, 14182, 53859, 26410, 110157
	mmu04068:FoxO signaling pathway	3.75	26413, 19082, 21812, 108097, 110157
	mmu04520:Adherens junction	3.31	26413, 21812, 14182, 14360
	mmu04650:Natural killer cell mediated cytotoxicity	2.83	16818, 26413, 14360, 110157
	mmu04360:Axon guidance	2.58	26413, 13837, 13844, 14360
	mmu04550:Signaling pathways regulating pluripotency of stem cells	2.5	26413, 14182, 269275, 110157
	mmu04910:Insulin signaling pathway	2.48	26413, 19082, 108097, 110157
	mmu04921:Oxytocin signaling pathway	2.39	26413, 19082, 108097, 110157
	mmu05230:Central carbon metabolism in cancer	2.07	26413, 14182, 110157
	mmu05210:Colorectal cancer	2.07	26413, 21812, 110157
	mmu05212:Pancreatic cancer	2.05	26413, 21812, 110157
	mmu04664:Fc epsilon RI signaling pathway	2.02	26413, 14360, 110157
	mmu04510:Focal adhesion	2	26413, 14360, 14257, 110157
	mmu05218:Melanoma	1.98	26413, 14182, 110157
	mmu05220:Chronic myeloid leukemia	1.97	26413, 21812, 110157
	mmu04015:Rap1 signaling pathway	1.97	26413, 14182, 14257, 110157
	mmu04014:Ras signaling pathway	1.89	26413, 14182, 14257, 110157
	mmu04350:TGF-beta signaling pathway	1.83	26413, 21812, 269275
	mmu05215:Prostate cancer	1.8	26413, 14182, 110157
	mmu04668:TNF signaling pathway	1.63	26413, 53859, 26410
	mmu04931:Insulin resistance	1.62	19082, 228775, 108097
	mmu04071:Sphingolipid signaling pathway	1.52	26413, 14360, 110157
	mmu04151:PI3K-Akt signaling pathway	1.4	26413, 14182, 14257, 110157
	mmu05161:Hepatitis B	1.39	26413, 21812, 110157
