# Supplementary material for: A multiplexed siRNA screen identifies key kinase signaling networks of brain glia
Source: Life Sci Alliance. 2023 Mar 6;6(5):e202201605. doi: 10.26508/lsa.202201605 (PMC9990460; doi:10.26508/lsa.202201605)
Supplement: Supplementary file 10 [file LSA-2022-01605_TableS10.xlsx]

## Sheet: Table S10
	Table S10. Kinases identified in Zymosan uptake assay
	siRNAs increasing phagocytosis (kinases inhibiting phagocytosis)
	Kinase	Gene ID	log2(FC)	Description
	Pak1	18479	3.3	p21_(CDKN1A)-activated_kinase_1_(Pak1)
	Dtymk	21915	2.8	deoxythymidylate_kinase_(Dtymk)
	Zap70	22637	2.8	zeta-chain_(TCR)_associated_protein_kinase_(Zap70)
	Tssk6	83984	2.8	testis-specific_serine_kinase_6_(Tssk6)
	Ak7	78801	2.7	adenylate_kinase_7_(Ak7)
	Map2k4	26398	2.6	mitogen_activated_protein_kinase_kinase_4_(Map2k4)
	Mvk	17855	2.5	mevalonate_kinase_(Mvk)
	Acvrl1	11482	2.3	activin_A_receptor,_type_II-like_1_(Acvrl1)
	Gm1078	381835	2.1	gene_model_1078,_(NCBI)_(Gm1078)
	Map2k1	26395	2.1	mitogen_activated_protein_kinase_kinase_1_(Map2k1)
	Ccrk	105278	2.1	cell_cycle_related_kinase_(Ccrk)
	Acvr1	11477	1.6	activin_A_receptor,_type_1_(Acvr1)
	Alk	11682	1.4	anaplastic_lymphoma_kinase_(Alk)
	Mapk6	50772	1.2	mitogen-activated_protein_kinase_6_(Mapk6),_transcriptvariant_1
	Mark3	17169	1.2	MAP/microtubule_affinity-regulating_kinase_3_(Mark3),transcript_variant_2
	Obscn	380698	1.2	obscurin,_cytoskeletal_calmodulin_and_titin-interactingRhoGEF_(Obscn)
	Ipmk	69718	1.2	inositol_polyphosphate_multikinase_(Ipmk)
	Ror2	26564	1.1	receptor_tyrosine_kinase-like_orphan_receptor_2(Ror2)
	Stk32a	269019	1.1	serine/threonine_kinase_32A_(Stk32a)
	Ddr2	18214	1	discoidin_domain_receptor_family,_member_2_(Ddr2)
	2610019A05Rik	72149	1	RIKEN_cDNA_2610019A05_gene_(2610019A05Rik)
	Ckm	12715	0.9	creatine_kinase,_muscle_(Ckm)
	Clk1	12747	0.9	CDC-like_kinase_1_(Clk1),_transcript_variant_1
	Carkl	74637	0.9	carbohydrate_kinase-like_(Carkl)
	Ripk3	56532	0.9	receptor-interacting_serine-threonine_kinase_3_(Ripk3)
	Mastl	67121	0.9	microtubule_associated_serine/threonine_kinase-like(Mastl)
	Map3k14	53859	0.9	mitogen-activated_protein_kinase_kinase_kinase_14(Map3k14)
	Tssk3	58864	0.8	testis-specific_serine_kinase_3_(Tssk3)
	Npr1	18160	0.7	natriuretic_peptide_receptor_1_(Npr1)
	Wnk4	69847	0.7	WNK_lysine_deficient_protein_kinase_4_(Wnk4)
	Mast1	56527	0.7	microtubule_associated_serine/threonine_kinase_1(Mast1)
	Stk16	20872	0.7	serine/threonine_kinase_16_(Stk16)
	Stk31	77485	0.7	serine_threonine_kinase_31_(Stk31)
	Pdik1l	230809	0.7	PDLIM1_interacting_kinase_1_like_(Pdik1l)
	Pdgfrb	18596	0.7	platelet_derived_growth_factor_receptor,_betapolypeptide_(Pdgfrb)
	Pkd2l1	329064	0.7	polycystic_kidney_disease_2-like_1_(Pkd2l1)
	Taf1	270627	0.7	TAF1_RNA_polymerase_II,_TATA_box_bindingprotein_(TBP)-associated_factor,_transcript_variant_13(Taf1)
	Rps6kl1	238323	0.6	ribosomal_protein_S6_kinase-like_1_(Rps6kl1)
	Ankk1	244859	0.6	ankyrin_repeat_and_kinase_domain_containing_1_(Ankk1)
	Pdk4	18604	0.6	pyruvate_dehydrogenase_kinase,_isoenzyme_4_(Pdk4)
	Brd3	67382	0.6	bromodomain_containing_3_(Brd3)
	Mapk4	225724	0.6	mitogen-activated_protein_kinase_4_(Mapk4)
	Uckl1	68556	0.6	uridine-cytidine_kinase_1-like_1_(Uckl1)
	Hunk	26559	0.6	hormonally_upregulated_Neu-associated_kinase_(Hunk)
	Taok2	381921	0.6	TAO_kinase_2
	Pank3	211347	0.6	pantothenate_kinase_3_(Pank3)
	Nek6	59126	0.6	NIMA_(never_in_mitosis_gene_a)-related_expressedkinase_6_(Nek6)
	Pip5k1b	18720	0.6	phosphatidylinositol-4-phosphate_5-kinase,_type_1_beta(Pip5k1b)
	Map2k7	26400	0.6	mitogen_activated_protein_kinase_kinase_7_(Map2k7),transcript_variant_1
	siRNAs decreasing phagocytosis (kinases enhancing phagocytosis)
	Kinase	Gene ID	log2(FC)	Description
	Src	20779	-2.8	Rous_sarcoma_oncogene_(Src),_transcript_variant_1
	Dmpk	13400	-2	dystrophia_myotonica-protein_kinase_(Dmpk)
	Fgr	14191	-1.9	Gardner-Rasheed_feline_sarcoma_viral_(Fgr)_oncogenehomolog_(Fgr)
	Brdt	114642	-1.9	bromodomain,_testis-specific_(Brdt)
	Mapk1	26413	-1.8	mitogen_activated_protein_kinase_1_(Mapk1),_transcriptvariant_2
	Dcamkl2	70762	-1.7	doublecortin_and_CaM_kinase-like_2_(Dcamkl2)
	Tssk4	71099	-1.7	testis-specific_serine_kinase_4_(Tssk4)
	Stk39	53416	-1.7	serine/threonine_kinase_39,_STE20/SPS1_homolog_(yeast)(Stk39)
	Melk	17279	-1.6	maternal_embryonic_leucine_zipper_kinase_(Melk)
	Dapk2	13143	-1.6	death-associated_kinase_2_(Dapk2)
	Ephb3	13845	-1.5	Eph_receptor_B3_(Ephb3)
	Mylk	107589	-1.5	myosin,_light_polypeptide_kinase_(Mylk)
	Pkn1	320795	-1.5	protein_kinase_N1_(Pkn1)
	Gsg2	14841	-1.5	germ_cell-specific_gene_2_(Gsg2)
	Lrrk2	66725	-1.5	leucine-rich_repeat_kinase_2_(Lrrk2)
	Bmpr1a	12166	-1.5	bone_morphogenetic_protein_receptor,_type_1A_(Bmpr1a)
	Egfr	13649	-1.4	epidermal_growth_factor_receptor_(Egfr),_transcriptvariant_1
	Pdxk	216134	-1.4	pyridoxal_(pyridoxine,_vitamin_B6)_kinase_(Pdxk)
	Adck5	268822	-1.4	aarF_domain_containing_kinase_5_(Adck5)
	Pip5k3	18711	-1.4	phosphatidylinositol-3-phosphate/phosphatidylinositol5-kinase,_type_III_(Pip5k3)
	Map3k3	26406	-1.4	mitogen_activated_protein_kinase_kinase_kinase_3(Map3k3)
	Irak4	266632	-1.3	interleukin-1_receptor-associated_kinase_4_(Irak4)
	Csnk1e	27373	-1.3	casein_kinase_1,_epsilon_(Csnk1e)
	Akt3	23797	-1.3	thymoma_viral_proto-oncogene_3_(Akt3)
	Ptk2	14083	-1.3	PTK2_protein_tyrosine_kinase_2_(Ptk2)
	Csnk2a2	13000	-1.3	casein_kinase_2,_alpha_prime_polypeptide_(Csnk2a2)
	Kalrn	545156	-1.3	kalirin,_RhoGEF_kinase,_transcript_variant_8(Kalrn)
	Hck	15162	-1.3	hemopoietic_cell_kinase_(Hck)
	Chka	12660	-1.2	choline_kinase_alpha_(Chka),_transcript_variant_1
	Prkab2	108097	-1.2	protein_kinase,_AMP-activated,_beta_2_non-catalyticsubunit_(Prkab2)
	Alpk3	116904	-1.2	alpha-kinase_3_(Alpk3)
	Sgk3	170755	-1.2	serum/glucocorticoid_regulated_kinase_3_(Sgk3),transcript_variant_3
	Adck4	76889	-1.2	aarF_domain_containing_kinase_4_(Adck4)
	Mast4	328329	-1.2	microtubule_associated_serine/threoninekinase_family_member_4_(Mast4)
	Nek8	140859	-1.1	NIMA_(never_in_mitosis_gene_a)-related_expressedkinase_8_(Nek8)
	Pfkfb2	18640	-1.1	6-phosphofructo-2-kinase/fructose-2,6-biphosphatase_2(Pfkfb2)
	Tek	21687	-1.1	endothelial-specific_receptor_tyrosine_kinase_(Tek)
	Pdk3	236900	-1.1	pyruvate_dehydrogenase_kinase,_isoenzyme_3_(Pdk3)
	Tnni3k	435766	-1.1	TNNI3_interacting_kinase,_transcriptvariant_4_(Tnni3k)
	Pink1	68943	-1.1	PTEN_induced_putative_kinase_1_(Pink1)
	Ern1	78943	-1.1	endoplasmic_reticulum_(ER)_to_nucleus_signalling_1(Ern1)
	Ryk	20187	-1.1	receptor-like_tyrosine_kinase_(Ryk),_transcript_variant2
	Prkce	18754	-1.1	protein_kinase_C,_epsilon_(Prkce)
	Mark1	226778	-1.1	MAP/microtubule_affinity-regulating_kinase_1_(Mark1)
	Riok2	67045	-1.1	RIO_kinase_2_(yeast)_(Riok2)
	Map3k4	26407	-1.1	mitogen_activated_protein_kinase_kinase_kinase_4(Map3k4)
	Cdk4	12567	-1.1	cyclin-dependent_kinase_4_(Cdk4)
	Dck	13178	-1.1	deoxycytidine_kinase_(Dck)
	Tec	21682	-1.1	cytoplasmic_tyrosine_kinase,_Dscr28C_related(Drosophila)_(Tec)
	Eif2ak3	13666	-1	eukaryotic_translation_initiation_factor_2_alpha_kinase3_(Eif2ak3)
	Gucy2c	14917	-1	guanylate_cyclase_2c_(Gucy2c)
	Map3k11	26403	-1	mitogen_activated_protein_kinase_kinase_kinase_11(Map3k11)
	Frap1	56717	-1	FK506_binding_protein_12-rapamycin_associated_protein_1(Frap1)
	Map3k2	26405	-1	mitogen_activated_protein_kinase_kinase_kinase_2(Map3k2)
	Cdc2a	12534	-1	cell_division_cycle_2_homolog_A_(S._pombe)_(Cdc2a)
	Ksr1	16706	-1	kinase_suppressor_of_ras_1_(Ksr1)
	Nek7	59125	-0.9	NIMA_(never_in_mitosis_gene_a)-related_expressedkinase_7_(Nek7)
	Camk2b	12323	-0.9	calcium/calmodulin-dependent_protein_kinase_II,_beta(Camk2b)
	Btk	12229	-0.9	Bruton_agammaglobulinemia_tyrosine_kinase_(Btk)
	Prkag1	19082	-0.9	protein_kinase,_AMP-activated,_gamma_1_non-catalyticsubunit_(Prkag1)
	Epha8	13842	-0.9	Eph_receptor_A8_(Epha8)
	Pi4k2b	67073	-0.9	phosphatidylinositol_4-kinase_type_2_beta_(Pi4k2b),transcript_variant_1
	Pip5k1c	18717	-0.9	phosphatidylinositol-4-phosphate_5-kinase,_type_1gamma_(Pip5k1c)
	Trpm6	225997	-0.9	transient_receptor_potential_cation_channel,_subfamilyM,_member_6_(Trpm6)
	Stk4	58231	-0.9	serine/threonine_kinase_4_(Stk4)
	Ret	19713	-0.9	ret_proto-oncogene_(Ret)
	Pftk1	18647	-0.9	PFTAIRE_protein_kinase_1_(Pftk1)
	Stk33	117229	-0.9	serine/threonine_kinase_33_(Stk33)
	Nek5	330721	-0.9	NIMA_(never_in_mitosis_gene_a)-related_expressedkinase_5_(Nek5)
	Dcamkl3	245038	-0.8	doublecortin_and_CaM_kinase-like_3(Dcamkl3)
	Nek9	217718	-0.8	NIMA_(never_in_mitosis_gene_a)-related_expressed_kinase9_(Nek9)
	Matk	17179	-0.8	megakaryocyte-associated_tyrosine_kinase_(Matk)
	Ptk9	19230	-0.8	protein_tyrosine_kinase_9_(Ptk9)
	Map3k15	270672	-0.8	mitogen-activated_protein_kinase_kinasekinase_15_(Map3k15)
	Pik3cd	18707	-0.8	phosphatidylinositol_3-kinase_catalytic_deltapolypeptide_(Pik3cd),_transcript_variant_2
	Acvr1b	11479	-0.8	activin_A_receptor,_type_1B_(Acvr1b)
	Gucy2f	245650	-0.8	guanylate_cyclase_2f_(Gucy2f)
	Ripk1	19766	-0.8	receptor_(TNFRSF)-interacting_serine-threonine_kinase1_(Ripk1)
	Camkk1	55984	-0.8	calcium/calmodulin-dependent_protein_kinase_kinase_1,alpha_(Camkk1)
	Ulk1	22241	-0.8	Unc-51_like_kinase_1_(C._elegans)_(Ulk1)
	Map3k9	338372	-0.8	mitogen-activated_protein_kinase_kinase_kinase_9(Map3k9)
	BC033915	70661	-0.8	cDNA_sequence_BC033915_(BC033915)
	Pnck	93843	-0.8	pregnancy_upregulated_non-ubiquitously_expressed_CaMkinase_(Pnck)
	Rps6ka6	67071	-0.8	ribosomal_protein_S6_kinase_polypeptide_6_(Rps6ka6)
	Phkb	102093	-0.8	phosphorylase_kinase_beta_(Phkb)
	Sphk1	20698	-0.8	sphingosine_kinase_1_(Sphk1),_transcript_variant_2
	Brd4	57261	-0.7	bromodomain_containing_4_(Brd4),_transcript_variant_2
	Abl1	78801	-0.7	v-abl_Abelson_murine_leukemia_oncogene_1_(Abl1)
	Vrk2	69922	-0.7	vaccinia_related_kinase_2_(Vrk2)
	Plk2	20620	-0.7	polo-like_kinase_2_(Drosophila)_(Plk2)
	Brsk1	381979	-0.7	BR_serine/threonine_kinase_1_(Brsk1)
	Dyrk3	226419	-0.7	dual-specificity_tyrosine-(Y)-phosphorylationregulated_kinase_3_(Dyrk3)
	Pik3cb	74769	-0.7	phosphatidylinositol_3-kinase,_catalytic,_betapolypeptide_(Pik3cb)
	Lck	16818	-0.7	lymphocyte_protein_tyrosine_kinase_(Lck)
	Pim3	223775	-0.7	proviral_integration_site_3_(Pim3)
	Nme5	75533	-0.7	expressed_in_non-metastatic_cells_5_(Nme5)
	Rbks	71336	-0.7	ribokinase_(Rbks)
	Musk	18198	-0.7	muscle,_skeletal,_receptor_tyrosine_kinase_(Musk),transcript_variant_3
	Syk	20963	-0.7	spleen_tyrosine_kinase_(Syk)
	Bmp2k	140780	-0.7	BMP2_inducible_kinase_(Bmp2k)
	Mertk	17289	-0.6	c-mer_proto-oncogene_tyrosine_kinase(Mertk)
	Phkg1	18682	-0.6	phosphorylase_kinase_gamma_1_(Phkg1)
	Snf1lk	17691	-0.6	SNF1-like_kinase_(Snf1lk)
	Dgkz	104418	-0.6	diacylglycerol_kinase_zeta_(Dgkz)
	Xylb	102448	-0.6	xylulokinase_homolog_(H._influenzae)_(Xylb)
	Ephb1	270190	-0.6	Eph_receptor_B1_(Ephb1)
	Ulk2	29869	-0.6	Unc-51_like_kinase_2_(C._elegans)_(Ulk2)
	Phka1	18679	-0.6	phosphorylase_kinase_alpha_1_(Phka1),_transcriptvariant_1
	Erbb3	13867	-0.6	v-erb-b2_erythroblastic_leukemia_viral_oncogene_homolog3_(avian)_(Erbb3)
	Pik3ca	18706	-0.6	phosphatidylinositol_3-kinase,_catalytic,_alphapolypeptide_(Pik3ca)
	Itpkc	233011	-0.6	inositol_1,4,5-trisphosphate_3-kinase_C_(Itpkc)
	Braf	109880	-0.6	Braf_transforming_gene_(Braf)
