# Supplementary material for: A multiplexed siRNA screen identifies key kinase signaling networks of brain glia
Source: Life Sci Alliance. 2023 Mar 6;6(5):e202201605. doi: 10.26508/lsa.202201605 (PMC9990460; doi:10.26508/lsa.202201605)
Supplement: Supplementary file 11 [file LSA-2022-01605_TableS11.xlsx]

## Sheet: Table S11
	Table S11. KEGG pathway of the kinases identified in Zymosan uptake assay
	KEGG pathway of glial phagocytosis inhibitors
	Term	p-value (log)	Kinases (Entrez ID)
	mmu04010:MAPK signaling pathway	4.26	18596, 26398, 381921, 26395, 18479, 53859, 26400
	mmu04660:T cell receptor signaling pathway	3.77	26395, 18479, 22637, 53859, 26400
	mmu04668:TNF signaling pathway	3.64	26398, 26395, 56532, 53859, 26400
	mmu04012:ErbB signaling pathway	2.73	26398, 26395, 18479, 26400
	mmu04664:Fc epsilon RI signaling pathway	1.8	26398, 26395, 26400
	mmu04810:Regulation of actin cytoskeleton	1.66	18596, 26395, 18720, 18479
	mmu04666:Fc gamma R-mediated phagocytosis	1.63	26395, 18720, 18479
	mmu04912:GnRH signaling pathway	1.59	26398, 26395, 26400
	mmu04014:Ras signaling pathway	1.58	18596, 26395, 18479, 22637
	mmu04620:Toll-like receptor signaling pathway	1.48	26398, 26395, 26400
	mmu05231:Choline metabolism in cancer	1.48	18596, 26395, 18720
	mmu04650:Natural killer cell mediated cytotoxicity	1.45	26395, 18479, 22637
	mmu04380:Osteoclast differentiation	1.3	26395, 53859, 26400
	mmu05169:Epstein-Barr virus infection	1.24	26398, 53859, 26400
	mmu01100:Metabolic pathways	1.24	78801, 21915, 17855, 68556, 12715, 211347, 18720, 69718
	mmu05164:Influenza A	1.07	26398, 26395, 26400
	KEGG pathway of glial phagocytosis enhancers
	Term	p-value (log)	Kinases (Entrez ID)
	mmu04012:ErbB signaling pathway	9.13	13649, 26413, 56717, 74769, 12323, 20779, 13867, 14083, 109880, 23797, 18707, 18706
	mmu04150:mTOR signaling pathway	8.28	26413, 56717, 74769, 29869, 67071, 22241, 109880, 23797, 18707, 18706
	mmu04068:FoxO signaling pathway	8.18	170755, 13649, 26413, 74769, 19082, 27373, 58231, 20620, 109880, 23797, 108097, 18707, 18706
	mmu04910:Insulin signaling pathway	6.93	18682, 26413, 56717, 74769, 19082, 102093, 18679, 109880, 23797, 108097, 18707, 18706
	mmu04666:Fc gamma R-mediated phagocytosis	6.9	26413, 74769, 18717, 18754, 15162, 23797, 20963, 18707, 20698, 18706
	mmu04722:Neurotrophin signaling pathway	6.51	266632, 26413, 74769, 12323, 17179, 26406, 67071, 109880, 23797, 18707, 18706
	mmu05231:Choline metabolism in cancer	6.2	13649, 26413, 56717, 74769, 18717, 104418, 23797, 18707, 18706, 12660
	mmu04370:VEGF signaling pathway	5.71	26413, 74769, 20779, 14083, 23797, 18707, 20698, 18706
	mmu05230:Central carbon metabolism in cancer	5.52	13649, 26413, 56717, 74769, 19713, 23797, 18707, 18706
	mmu04066:HIF-1 signaling pathway	5.14	13649, 26413, 56717, 21687, 74769, 12323, 23797, 18707, 18706
	mmu04931:Insulin resistance	4.9	56717, 74769, 19082, 18754, 67071, 23797, 108097, 18707, 18706
	mmu04380:Osteoclast differentiation	4.47	16818, 26413, 74769, 12229, 21682, 23797, 20963, 18707, 18706
	mmu04152:AMPK signaling pathway	4.42	56717, 74769, 19082, 55984, 18640, 23797, 108097, 18707, 18706
	mmu04611:Platelet activation	4.35	26413, 74769, 12229, 20779, 107589, 23797, 20963, 18707, 18706
	mmu04810:Regulation of actin cytoskeleton	4.33	13649, 26413, 74769, 18717, 20779, 18711, 14083, 107589, 109880, 18707, 18706
	mmu04070:Phosphatidylinositol signaling system	4.32	74769, 18717, 18711, 104418, 67073, 233011, 18707, 18706
	mmu04664:Fc epsilon RI signaling pathway	4.26	26413, 74769, 12229, 23797, 20963, 18707, 18706
	mmu04922:Glucagon signaling pathway	4.24	18682, 19082, 12323, 102093, 18679, 17691, 23797, 108097
	mmu05160:Hepatitis C	4.23	13666, 13649, 26413, 74769, 19766, 109880, 23797, 18707, 18706
	mmu04660:T cell receptor signaling pathway	4.21	16818, 26413, 74769, 21682, 12567, 23797, 18707, 18706
	mmu04662:B cell receptor signaling pathway	4.19	26413, 74769, 12229, 23797, 20963, 18707, 18706
	mmu00562:Inositol phosphate metabolism	4.19	74769, 18717, 18711, 67073, 233011, 18707, 18706
	mmu05220:Chronic myeloid leukemia	4.12	26413, 74769, 12567, 109880, 23797, 18707, 18706
	mmu04930:Type II diabetes mellitus	3.88	26413, 56717, 74769, 18754, 18707, 18706
	mmu04919:Thyroid hormone signaling pathway	3.87	26413, 56717, 74769, 20779, 18640, 23797, 18707, 18706
	mmu04062:Chemokine signaling pathway	3.87	26413, 14191, 74769, 20779, 14083, 15162, 109880, 23797, 18707, 18706
	mmu04151:PI3K-Akt signaling pathway	3.77	21687, 13649, 14083, 320795, 170755, 56717, 26413, 74769, 12567, 23797, 18707, 20963, 18706
	mmu04510:Focal adhesion	3.69	13649, 26413, 74769, 20779, 14083, 107589, 109880, 23797, 18707, 18706
	mmu04912:GnRH signaling pathway	3.63	13649, 26413, 12323, 20779, 26405, 26406, 26407
	mmu04020:Calcium signaling pathway	3.39	18682, 13649, 12323, 13867, 102093, 18679, 107589, 233011, 20698
	mmu04915:Estrogen signaling pathway	3.38	13649, 26413, 74769, 20779, 23797, 18707, 18706
	mmu04620:Toll-like receptor signaling pathway	3.31	266632, 26413, 74769, 19766, 23797, 18707, 18706
	mmu04650:Natural killer cell mediated cytotoxicity	3.22	16818, 26413, 74769, 109880, 20963, 18707, 18706
	mmu04921:Oxytocin signaling pathway	3.14	13649, 26413, 19082, 12323, 20779, 55984, 107589, 108097
	mmu04917:Prolactin signaling pathway	3.11	26413, 74769, 20779, 23797, 18707, 18706
	mmu04010:MAPK signaling pathway	3.07	13649, 26413, 26405, 26406, 26407, 67071, 58231, 109880, 23797, 26403
	mmu04015:Rap1 signaling pathway	2.89	13649, 26413, 21687, 74769, 20779, 109880, 23797, 18707, 18706
	mmu04071:Sphingolipid signaling pathway	2.84	26413, 74769, 18754, 23797, 18707, 20698, 18706
	mmu05152:Tuberculosis	2.74	266632, 26413, 12323, 20779, 16706, 23797, 20963, 20698
	mmu04014:Ras signaling pathway	2.71	13649, 26413, 21687, 74769, 16706, 58231, 23797, 18707, 18706
	mmu04550:Signaling pathways regulating pluripotency of stem cells	2.6	11479, 26413, 74769, 23797, 18707, 18706, 12166
	mmu04064:NF-kappa B signaling pathway	2.56	266632, 16818, 12229, 13000, 19766, 20963
	mmu04210:Apoptosis	2.53	74769, 19766, 23797, 18707, 18706
	mmu05161:Hepatitis B	2.48	26413, 74769, 20779, 12567, 23797, 18707, 18706
	mmu05142:Chagas disease (American trypanosomiasis)	2.44	266632, 26413, 74769, 23797, 18707, 18706
	mmu04668:TNF signaling pathway	2.34	26413, 74769, 19766, 23797, 18707, 18706
	mmu04725:Cholinergic synapse	2.27	26413, 74769, 12323, 23797, 18707, 18706
	mmu04920:Adipocytokine signaling pathway	2.24	56717, 19082, 55984, 23797, 108097
	mmu05164:Influenza A	2.15	13666, 266632, 26413, 74769, 23797, 18707, 18706
	mmu04960:Aldosterone-regulated sodium reabsorption	2.14	26413, 74769, 18707, 18706
	mmu05100:Bacterial invasion of epithelial cells	2.12	74769, 20779, 14083, 18707, 18706
	mmu04973:Carbohydrate digestion and absorption	2.08	74769, 23797, 18707, 18706
	mmu04750:Inflammatory mediator regulation of TRP channels	2.08	74769, 12323, 20779, 18754, 18707, 18706
	mmu04540:Gap junction	1.97	13649, 26413, 20779, 26405, 12534
	mmu05169:Epstein-Barr virus infection	1.94	74769, 19766, 23797, 20963, 18707, 18706
	mmu04024:cAMP signaling pathway	1.86	26413, 74769, 12323, 109880, 23797, 18707, 18706
	mmu04923:Regulation of lipolysis in adipocytes	1.72	74769, 23797, 18707, 18706
	mmu04720:Long-term potentiation	1.55	26413, 12323, 67071, 109880
	mmu04520:Adherens junction	1.45	13649, 26413, 20779, 13000
	mmu04360:Axon guidance	1.4	26413, 270190, 14083, 13845, 13842
