# Supplementary material for: A multiplexed siRNA screen identifies key kinase signaling networks of brain glia
Source: Life Sci Alliance. 2023 Mar 6;6(5):e202201605. doi: 10.26508/lsa.202201605 (PMC9990460; doi:10.26508/lsa.202201605)
Supplement: Supplementary file 15 [file LSA-2022-01605_TableS12.xlsx]

## Sheet: Table S12
	Table S12. Phenotypic clustering of the kinases identified in the multiplex screen
	Cluster 1
	Round 1	Round 2	Round 3	Round 4	Kinases
	Glia activators	Cell survival	Glial migration accelerators		Lmtk2
	Glia activators	Cell survival			Map3k6, Rps6kb2
	Glia activators		Glial migration accelerators		Ephb2, Epha3
	Glia activators			Phagocytosis enhancers	Irak4, Tek, Trpm6, Camk2b, Itk, Ulk1, Epha8, Egfr, Stk39, Ptk9
		Cell survival	Glial migration accelerators		Ntrk1, Nek11, Tk2, Taf1, Camk1, Fastk
		Cell survival		Phagocytosis enhancers	Map3k15, Gucy2c, Pfkfb2, Tssk4, Src, Csnk1e
			Glial migration accelerators	Phagocytosis enhancers	Mapk1, Lck, Ksr1, Prkab2, Prkag1, Musk, Mylk, Ulk2
	Glia activators				Map3k13, Rps6kl1, Trpm7, Camk2a, Camk1g, Tlk1, Nrk, Tk1, Ikbke, Ptk6, Hipk1, Ltk, Prkci, Npr1, Aurka, Csnk1g1, Wnk4, Jak1, Erbb2, Prkar2b, Taok2, Ckb, Gsk3b, Ptk9l, Bcr, Wee1, Met, Tnk2, Akt1, Trim28, Abl2, Irak1, Prkdc, Map4k1, Prkx, Jak2, Ephb6, Gck, Cdk5, Mos, Mapk15, Igf1r, Pmvk, Camk2g, Ulk3, Gsk3a, Fgfr4, Hk3, Ephb4, Tbk1, Mapk11, Epha5, Mapk13, Prkar2a, Tgfbr1, Rps6ka5, Ror2, Rps6kc1, Pik3…
		Cell survival			Pak3, Mak, Prkaca, Tex14, Trio, Map3k10, Aurkb, Hk1, Bub1b, Nrbp, Stk40, Pfkp, Mapk7, Epha7, Dgkd, Itpk1, Pctk3, BC030499, Pfkl, Tnk1, Ripk4, Khk
			Glial migration accelerators		2610018G03Rik, Prkcq, Fgfr1, Stk32c, Map3k8, Flt4, Hipk3, Ntrk2, Acvr1c, Fyn, 2610207I05Rik, Insrr, Uhmk1, Myo3a, Map3k14, D8Ertd82e, Guk1, Speg, Galk1, Sgk2, Trib3, Raf1
				Phagocytosis enhancers	Prkce, Cdk4, Plk2, Syk, Mast4, Map3k11, Stk33, Chka, Ephb3, Tnni3k, Rps6ka6, Pik3cb, Dgkz, Brdt, Pdk3, Cdc2a, Fgr, Pftk1, Ret, Rbks, Riok2, Ern1, Sgk3, Phkb, Map3k4, Pink1, Dmpk, Stk4, Btk, Akt3, Eif2ak3, Pim3, Dck, Nek5 Map3k2, Frap1, Brd4, Braf, Sphk1, Ptk2, Pip5k1c, Bmpr1a, Dapk2, Xylb, Pi4k2b, Ephb1, Vrk2, Dyrk3, Adck5, Csnk2a2, Adck4, Phka1, Bmp2k, Itpkc, Snf1lk, Gucy2f, Pip5k3, Nme5, Map3k9…
	Cluster 2
	Round 1	Round 2	Round 3	Round 4	Kinases
	Glia activators	Cell survival	Glial migration accelerators		Lmtk2
		Cell survival	Glial migration accelerators	Phagocytosis inhibitors	Taf1
	Glia activators	Cell survival			Map3k6, Rps6kb2
	Glia activators		Glial migration accelerators		Ephb2, Epha3, Ikbkb
	Glia activators			Phagocytosis inhibitors	Rps6kl1, Npr1, Wnk4, Taok2, Ror2, Tssk3
		Cell survival	Glial migration accelerators		Ntrk1, Nek11, Tk2, Camk1, Fastk
			Glial migration accelerators	Phagocytosis inhibitors	Map3k14
	Glia activators				Map3k13, Irak4, Trpm7, Camk2a, Camk1g, Tlk1, Nrk, Tk1, Ikbke, Ptk6, Hipk1, Ltk, Prkci, Aurka, Csnk1g1, Jak1, Erbb2, Prkar2b, Ckb, Gsk3b, Tek, Ptk9l, Bcr, Wee1, Met, Trpm6, Camk2b, Tnk2, Akt1, Itk, Trim28, Abl2, Ulk1, Irak1, Prkdc, Map4k1, Epha8, Egfr, Prkx, Jak2, Ephb6, Gck, Cdk5, Mos, Mapk15, Igf1r, Pmvk, Camk2g, Ulk3, Gsk3a, Fgfr4, Stk39, Hk3, Ephb4, Ptk9, Tbk1, Mapk11, Epha5, Mapk13, Prkar2a, …
		Cell survival			Pak3, Map3k15, Mak, Prkaca, Tex14, Trio, Gucy2c, Pfkfb2, Map3k10, Tssk4, Aurkb, Hk1, Bub1b, Nrbp, Stk40, Pfkp, Mapk7, Epha7, Dgkd, Itpk1, Pctk3, BC030499, Pfkl, Tnk1, Src, Csnk1e, Ripk4, Khk
			Glial migration accelerators		2610018G03Rik, Prkcq, Mapk1, Fgfr1, Stk32c, Lck, Map3k8, Flt4, Hipk3, Ntrk2, Ksr1, Acvr1c, Prkab2, Fyn, 2610207I05Rik, Insrr, Uhmk1, Myo3a, Prkag1, Musk, D8Ertd82e, Mylk, Guk1, Speg, Galk1, Sgk2, Trib3, Raf1, Ulk2
				Phagocytosis inhibitors	Mark3, Tssk6, Mapk6, Map2k4, Mast1, Ak7, Ipmk, Clk1, Brd3, Ankk1, Carkl, Stk16, Ccrk, Pak1, Map2k7, Pdk2, Pdgfrb, Nek6, Pkd2l1, Gm1078, Uckl1, Stk32a, Ddr2, Acvr1, Ckm, Dtymk, Pdik1l, Ripk3, 2610019A05Rik, Zap70, Mastl, Stk31, Hunk, Mapk4, Map2k1, Acvrl1, Mvk, Obscn, Pank3, Pip5k1b, Alk
	Cluster 3
	Round 1	Round 2	Round 3	Round 4	Kinases
	Glia activators	Cell survival	Glial migration decelerators		Rps6kb2
	Glia activators		Glial migration decelerators	Phagocytosis enhancers	Camk2b, Egfr, Stk39, Ptk9
	Glia activators	Cell survival			Map3k6, Lmtk2
	Glia activators		Glial migration decelerators		Prkci, Met, Tesk2, Mos, Prkar2a, Csf1r, Prkg2
	Glia activators			Phagocytosis enhancers	Tek, Trpm6, Itk, Ulk1, Irak4, Epha8, Ikbkb
		Cell survival	Glial migration decelerators		Itpk1
		Cell survival		Phagocytosis enhancers	Gucy2c, Pfkfb2, Src, Map3k15, Tssk4, Csnk1e
			Glial migration decelerators	Phagocytosis enhancers	Fgr, Csnk2a2, Nme5, Melk, Gsg2, Alpk3, Brdt, Rbks, Braf, Xylb, Phka1, Lrrk2, Pik3cd, Brsk1, Matk, Kalrn, Hck
	Glia activators				Camk1g, Nrk, Tk1, Ikbke, Hipk1, Npr1, Wnk4, Jak1, Ephb2, Prkar2b, Ptk9l, Bcr, Tnk2, Akt1, Prkdc, Map4k1, Prkx, Epha3, Jak2, Ephb6, Cdk5, Igf1r, Camk2g, Ulk3, Gsk3a, Fgfr4, Tbk1, Mapk13, Tgfbr1, Ror2, Rps6kc1, Pik3r3, Aak1, Pdk1, Tssk3, Stk32b, Mulk, Itpkb, Map3k13, Rps6kl1, Trpm7, Camk2a, Tlk1, Ptk6, Ltk, Aurka, Csnk1g1, Erbb2, Taok2, Ckb, Gsk3b, Wee1, Trim28, Abl2, Irak1, Gck, Mapk15, Pmvk, Ephb…
		Cell survival			Nek11, Tex14, Map3k10, Aurkb, Bub1b, Stk40, Epha7, Pctk3, Pfkl, Fastk, Pak3, Ntrk1, Mak, Tk2, Prkaca, Trio, Hk1, Nrbp, Taf1, Pfkp, Mapk7, Dgkd, BC030499, Camk1, Tnk1, Ripk4, Khk
			Glial migration decelerators		Mapk6, Atr, Grk1, Ankk1, Frk, Nek10, Prkch, Stk35, Prkaa2, Fn3k, Epha6, Oxsr1, Pank3, Gprk6, Uck2, Cdk2, Rfk, Mapkapk2, Ccrk, Cdc42bpb, Pdk2, Map4k2, Pip5k2a, Gm1078, Fgfr2, Dtymk, Prkar1b, Kdr, Nme3, Nme7, Pkm2, Sgk, Pik3c2b, Lrrk1, Pik3r2, Nrbp2, Ern2, Mapk4, Tyro3, Prkacb, AU021838, Acvr2b, Pip5k1b
				Phagocytosis enhancers	Prkce, Cdk4, Map3k11, Stk33, Tnni3k, Rps6ka6, Pik3cb, Mapk1, Pdk3, Pftk1, Ret, Riok2, Sgk3, Map3k4, Ksr1, Prkab2, Dck, Nek5, Map3k2, Brd4, Sphk1, Dapk2, Pi4k2b, Dyrk3, Adck4, Bmp2k, Snf1lk, Gucy2f, Map3k9, Musk, Dcamkl2, Mylk, Nek7, Pik3ca, Tec, Dcamkl3, Mark1, Phkg1, Pnck, Ulk2, Erbb3, Plk2, Mast4, Syk, Chka, Ephb3, Dgkz, Cdc2a, Lck, Ern1, Phkb, Pink1, Dmpk, Stk4, Btk, Akt3, Eif2ak3, Pim3, Frap1…
	Cluster 4
	Round 1	Round 2	Round 3	Round 4	Kinases
	Glia activators	Cell survival	Glial migration decelerators		Rps6kb2
	Glia activators	Cell survival			Map3k6, Lmtk2
	Glia activators		Glial migration decelerators		Prkci, Met, Camk2b, Egfr, Mos, Stk39, Ptk9, Prkar2a, Tesk2, Csf1r, Prkg2
	Glia activators			Phagocytosis inhibitors	Rps6kl1, Npr1, Wnk4, Taok2, Ror2, Tssk3
		Cell survival	Glial migration decelerators		Itpk1
		Cell survival		Phagocytosis inhibitors	Taf1
			Glial migration decelerators	Phagocytosis inhibitors	Mapk6, Ankk1, Ccrk, Pdk2, Gm1078, Dtymk, Mapk4, Pank3, Pip5k1b
	Glia activators				Map3k13, Irak4, Trpm7, Camk2a, Camk1g, Tlk1, Nrk, Tk1, Ikbke, Ptk6, Hipk1, Ltk, Aurka, Csnk1g1, Jak1, Erbb2, Ephb2, Prkar2b, Ckb, Gsk3b, Tek, Ptk9l, Bcr, Wee1, Trpm6, Tnk2, Akt1, Itk, Trim28, Abl2, Ulk1, Irak1, Prkdc, Map4k1, Epha8, Prkx, Epha3, Jak2, Ephb6, Gck, Cdk5, Mapk15, Igf1r, Pmvk, Camk2g, Ulk3, Gsk3a, Ikbkb, Fgfr4, Hk3, Ephb4, Tbk1, Mapk11, Epha5, Mapk13, Tgfbr1, Rps6ka5, Rps6kc1, Pik3r3…
		Cell survival			Pak3, Ntrk1, Nek11, Map3k15, Mak, Tk2, Prkaca, Tex14, Trio, Gucy2c, Pfkfb2, Map3k10, Tssk4, Aurkb, Hk1, Bub1b, Nrbp, Stk40, Pfkp, Mapk7, Epha7, Dgkd, Pctk3, BC030499, Pfkl, Camk1, Tnk1, Src, Csnk1e, Ripk4, Khk, Fastk
			Glial migration decelerators		Atr, Grk1, Gprk6, Brdt, Rfk, Cdk2, Uck2, Fgr, Rbks, Mapkapk2, Frk, Cdc42bpb, Map4k2, Pip5k2a, Nek10, Prkch, Fgfr2, Braf, Xylb, Prkar1b, Csnk2a2, Kdr, Stk35, Phka1, Nme3, Nme7, Nme5, Pkm2, Sgk, Prkaa2, Pik3cd, Lrrk2, Pik3c2b, Melk, Lrrk1, Brsk1, Pik3r2, Gsg2, Ern2, Nrbp2, Matk, Fn3k, Epha6, Oxsr1, Tyro3, Prkacb, Kalrn, Hck, AU021838, Alpk3, Acvr2b
				Phagocytosis inhibitors	Mark3, Tssk6, Map2k4, Mast1, Ak7, Ipmk, Clk1, Brd3, Carkl, Stk16, Pak1, Map2k7, Pdgfrb, Nek6, Pkd2l1, Uckl1, Stk32a, Ddr2, Acvr1, Ckm, Pdik1l, Map3k14, Ripk3, 2610019A05Rik, Zap70, Mastl, Stk31, Hunk, Map2k1, Acvrl1, Mvk, Obscn, Alk
	Cluster 5
	Round 1	Round 2	Round 3	Round 4	Kinases
	Glia inhibitors	Cell survival		Phagocytosis enhancers	Tssk4
	Glia inhibitors		Glial migration accelerators	Phagocytosis enhancers	Mylk
	Glia inhibitors			Phagocytosis enhancers	Dgkz, Map3k3
		Cell survival	Glial migration accelerators		Ntrk1, Nek11, Tk2, Taf1, Lmtk2, Camk1, Fastk
		Cell survival		Phagocytosis enhancers	Map3k15, Gucy2c, Pfkfb2, Src, Csnk1e
			Glial migration accelerators	Phagocytosis enhancers	Mapk1, Lck, Ksr1, Prkab2, Prkag1, Musk, Ikbkb, Ulk2
	Glia inhibitors				Grk1, Dyrk4, Brd3, Dyrk2, Map4k2, Pip5k2a, Ckmt1, Dgka, Csnk1g2, Riok3, Pkmyt1, Pi4k2a
		Cell survival			Pak3, Mak, Prkaca, Tex14, Trio, Map3k6, Map3k10, Aurkb, Hk1, Bub1b, Nrbp, Stk40, Pfkp, Mapk7, Epha7, Rps6kb2, Dgkd, Itpk1, Pctk3, BC030499, Pfkl, Tnk1, Ripk4, Khk
			Glial migration accelerators		2610018G03Rik, Prkcq, Fgfr1, Stk32c, Map3k8, Ephb2, Flt4, Hipk3, Ntrk2, Acvr1c, Fyn, 2610207I05Rik, Insrr, Epha3, Uhmk1, Myo3a, Map3k14, D8Ertd82e, Guk1, Speg, Sgk2, Galk1, Raf1, Trib3
				Phagocytosis enhancers	Prkce, Cdk4, Irak4, Plk2, Syk, Mast4, Map3k11, Stk33, Chka, Ephb3, Tnni3k, Rps6ka6, Pik3cb, Brdt, Pdk3, Cdc2a, Fgr, Pftk1, Ret, Rbks, Riok2, Ern1, Sgk3, Phkb, Map3k4, Pink1, Dmpk, Tek, Stk4, Btk, Trpm6, Akt3, Camk2b, Eif2ak3, Itk, Pim3, Dck, Nek5, Ulk1, Map3k2, Frap1, Brd4, Braf, Sphk1, Ptk2, Pip5k1c, Epha8, Egfr, Bmpr1a, Dapk2, Xylb, Pi4k2b, Ephb1, Vrk2, Adck5, Dyrk3, Csnk2a2, Adck4, Phka1, Bmp2…
	Cluster 6
	Round 1	Round 2	Round 3	Round 4	Kinases
		Cell survival	Glial migration accelerators	Phagocytosis inhibitors	Taf1
	Glia inhibitors	Cell survival			Tssk4
	Glia inhibitors		Glial migration accelerators		Mylk
	Glia inhibitors			Phagocytosis inhibitors	Brd3
		Cell survival	Glial migration accelerators		Ntrk1, Nek11, Tk2, Lmtk2, Camk1, Fastk
			Glial migration accelerators	Phagocytosis inhibitors	Map3k14
	Glia inhibitors				Grk1, Dyrk4, Dgkz, Dyrk2, Map4k2, Pip5k2a, Ckmt1, Dgka, Csnk1g2, Riok3, Map3k3, Pkmyt1, Pi4k2a
		Cell survival			Pak3, Map3k15, Mak, Prkaca, Tex14, Trio, Map3k6, Gucy2c, Pfkfb2, Map3k10, Aurkb, Hk1, Bub1b, Nrbp, Stk40, Pfkp, Mapk7, Epha7, Rps6kb2, Dgkd, Itpk1, Pctk3, BC030499, Pfkl, Tnk1, Src, Csnk1e, Ripk4, Khk
			Glial migration accelerators		2610018G03Rik, Prkcq, Mapk1, Fgfr1, Stk32c, Lck, Map3k8, Ephb2, Flt4, Hipk3, Ntrk2, Ksr1, Acvr1c, Prkab2, Fyn, 2610207I05Rik, Insrr, Epha3, Uhmk1, Myo3a, Prkag1, Musk, Ikbkb, D8Ertd82e, Guk1, Speg, Sgk2, Galk1, Raf1, Trib3, Ulk2
				Phagocytosis inhibitors	Mark3, Tssk6, Mapk6, Rps6kl1, Map2k4, Mast1, Ak7, Ipmk, Clk1, Npr1, Ankk1, Wnk4, Carkl, Stk16, Taok2, Ccrk, Pak1, Map2k7, Pdk2, Pdgfrb, Nek6, Pkd2l1, Gm1078, Uckl1, Stk32a, Ddr2, Acvr1, Ckm, Dtymk, Pdik1l, 2610019A05Rik, Ripk3, Zap70, Mastl, Stk31, Hunk, Mapk4, Ror2, Acvrl1, Map2k1, Mvk, Obscn, Tssk3, Pank3, Pip5k1b, Alk
	Cluster 7
	Round 1	Round 2	Round 3	Round 4	Kinases
	Glia inhibitors	Cell survival		Phagocytosis enhancers	Tssk4
	Glia inhibitors		Glial migration decelerators		Grk1, Map4k2, Pip5k2a
	Glia inhibitors			Phagocytosis enhancers	Dgkz, Mylk, Map3k3
		Cell survival	Glial migration decelerators		Rps6kb2, Itpk1
		Cell survival		Phagocytosis enhancers	Map3k15, Gucy2c, Pfkfb2, Src, Csnk1e
			Glial migration decelerators	Phagocytosis enhancers	Brdt, Fgr, Rbks, Camk2b, Braf, Egfr, Xylb, Csnk2a2, Phka1, Nme5, Lrrk2, Pik3cd, Melk, Stk39, Brsk1, Ptk9, Gsg2, Matk, Kalrn, Hck, Alpk3
	Glia inhibitors				Dyrk4, Brd3, Dyrk2, Ckmt1, Dgka, Csnk1g2, Riok3, Pkmyt1, Pi4k2a
		Cell survival			Pak3, Ntrk1, Nek11, Mak, Tk2, Prkaca, Tex14, Trio, Map3k6, Map3k10, Aurkb, Hk1, Bub1b, Nrbp, Stk40, Taf1, Pfkp, Mapk7, Epha7, Dgkd, Lmtk2, Pctk3, BC030499, Pfkl, Camk1, Tnk1, Ripk4, Khk, Fastk
			Glial migration decelerators		Mapk6, Atr, Gprk6, Rfk, Cdk2, Uck2, Prkci, Ankk1, Mapkapk2, Ccrk, Frk, Cdc42bpb, Pdk2, Met, Gm1078, Nek10, Prkch, Fgfr2, Dtymk, Prkar1b, Mos, Kdr, Stk35, Nme3, Nme7, Pkm2, Sgk, Prkaa2, Pik3c2b, Lrrk1, Pik3r2, Nrbp2, Ern2, Prkar2a, Mapk4, Fn3k, Tesk2, Epha6, Oxsr1, Tyro3, Prkacb, Csf1r, Prkg2, AU021838, Pank3, Acvr2b, Pip5k1b
				Phagocytosis enhancers	Prkce, Cdk4, Irak4, Plk2, Syk, Mast4, Map3k11, Stk33, Chka, Ephb3, Tnni3k, Rps6ka6, Pik3cb, Mapk1, Pdk3, Cdc2a, Lck, Pftk1, Ret, Riok2, Ern1, Sgk3, Phkb, Map3k4, Pink1, Dmpk, Tek, Stk4, Ksr1, Btk, Prkab2, Trpm6, Akt3, Eif2ak3, Itk, Pim3, Dck, Nek5, Ulk1, Map3k2, Frap1, Brd4, Sphk1, Ptk2, Pip5k1c, Epha8, Bmpr1a, Dapk2, Pi4k2b, Ephb1, Vrk2, Dyrk3, Adck5, Adck4, Bmp2k, Itpkc, Snf1lk, Gucy2f, Pip5k3,…
	Cluster 8
	Round 1	Round 2	Round 3	Round 4	Kinases
	Glia inhibitors	Cell survival			Tssk4
	Glia inhibitors		Glial migration decelerators		Grk1, Map4k2, Pip5k2a
	Glia inhibitors			Phagocytosis inhibitors	Brd3
		Cell survival	Glial migration decelerators		Rps6kb2, Itpk1
		Cell survival		Phagocytosis inhibitors	Taf1
			Glial migration decelerators	Phagocytosis inhibitors	Mapk6, Ankk1, Ccrk, Pdk2, Gm1078, Dtymk, Mapk4, Pank3, Pip5k1b
	Glia inhibitors				Dyrk4, Dgkz, Dyrk2, Ckmt1, Dgka, Csnk1g2, Riok3, Mylk, Map3k3, Pkmyt1, Pi4k2a
		Cell survival			Pak3, Ntrk1, Nek11, Map3k15, Mak, Tk2, Prkaca, Tex14, Trio, Map3k6, Gucy2c, Pfkfb2, Map3k10, Aurkb, Hk1, Bub1b, Nrbp, Stk40, Pfkp, Mapk7, Epha7, Dgkd, Lmtk2, Pctk3, BC030499, Pfkl, Camk1, Tnk1, Src, Csnk1e, Ripk4, Khk, Fastk
			Glial migration decelerators		Atr, Gprk6, Brdt, Rfk, Cdk2, Uck2, Fgr, Prkci, Rbks, Mapkapk2, Frk, Cdc42bpb, Met, Camk2b, Nek10, Prkch, Fgfr2, Braf, Egfr, Xylb, Prkar1b, Mos, Kdr, Csnk2a2, Phka1, Stk35, Nme3, Nme7, Nme5, Pkm2, Sgk, Prkaa2, Pik3c2b, Lrrk2, Pik3cd, Melk, Lrrk1, Stk39, Brsk1, Pik3r2, Ptk9, Gsg2, Nrbp2, Ern2, Prkar2a, Matk, Fn3k, Tesk2, Epha6, Oxsr1, Tyro3, Prkacb, Kalrn, Csf1r, Prkg2, Hck, AU021838, Alpk3, Acvr2b
				Phagocytosis inhibitors	Mark3, Tssk6, Rps6kl1, Map2k4, Mast1, Ak7, Ipmk, Clk1, Npr1, Wnk4, Carkl, Stk16, Taok2, Pak1, Map2k7, Pdgfrb, Nek6, Pkd2l1, Uckl1, Stk32a, Ddr2, Acvr1, Ckm, Pdik1l, Map3k14, Ripk3, 2610019A05Rik, Zap70, Mastl, Stk31, Hunk, Ror2, Map2k1, Acvrl1, Mvk, Tssk3, Obscn, Alk
